# Supplementary material for: Use of antibiotics for urinary tract infection in women undergoing surgery for urinary incontinence: a cohort study
Source: HighWire-hosted journal article supplement (doi:10.1136/bmjopen-2013-004051), 2014-02-01
Supplement: bmjopen-2013-004051supp.pdf [file bmjopen-2013-004051supp.pdf]

## **Appendix 1** Surgical procedures according to the Danish Nordic Medico-Statistical Committee

KDG00 = Retropubic suspension of urethra  
KDG01 = Percutaneous endoscopic retropubic suspension of urethra  
KDG10 = Abdominovaginal suspension of bladder neck  
KDG30 = Suprapubic sling urethrocystopexy  
KDG31 = Percutaneous endoscopic suprapubic sling  
KDG40 = Suprapubic urethrocystopexy  
KDG50 = Transabdominal plastic repair of pelvic floor for urinary incontinence  
KDG96 = Other operation on urethra or bladder neck for incontinence  
KDG97 = Other percutaneous endoscopic operation on urethra or bladder neck for incontinence  
KDV20 = Submucous urethral injection  
KDV22 = Transluminal endoscopic submucous urethral injection  
KLEG00 = Vaginal urethrocystorrhaphy  
KLEG10 = Vaginal urethrocystopexy with use of sling  
KLEG10A = Vaginal urethrocystopexy with use of sling through foramen obturatum  
KLEG20 = Plastic repair of female pelvic floor with levator division  
KLEG96 = Other vaginal operation for incontinence
